# Supplementary material for: A Muscle Load Feedback Application for Strength Training: A Proof-of-Concept Study
Source: MDPI journal article supplement (doi:10.3390/sports11090170), 2023-09-05
Supplement: s1 [file s1]

## Supplementary file S1: Primary and secondary muscle contributions

| Machine                            | Primary muscle group(s) | Secondary muscle group(s) |
|------------------------------------|-------------------------|---------------------------|
| Leg press                          | Quadriceps              | Hamstrings                |
|                                    | Buttocks                | Abductors                 |
|                                    |                         | Adductors                 |
|                                    |                         | Calves                    |
| Leg curl                           | Hamstrings              |                           |
| Leg extension                      | Quadriceps              |                           |
| Hip adduction                      | Adductors               |                           |
| Hip abduction                      | Abductors               |                           |
| Abdominal crunch                   | Abs                     |                           |
|                                    | Obliques                |                           |
| Torso rotation                     | Obliques                |                           |
| Back extension                     | Low back                |                           |
| Chest press                        | Chest                   | Shoulders anterior        |
|                                    |                         | Triceps                   |
| Pectoral fly                       | Chest                   |                           |
| Rear deltoid/ Reverse pectoral fly | Upper back              |                           |
| Seated row machine                 | Upper back              | Lats                      |
|                                    |                         | Shoulders posterior       |
|                                    |                         | Biceps                    |
| Low row horizontal cable           | Upper back              | Lats                      |
|                                    |                         | Shoulders posterior       |
|                                    |                         | Biceps                    |
| Lat pulldown                       | Lats                    | Upper back                |
|                                    |                         | Lower back                |
|                                    |                         | Biceps                    |
| Triceps pushdown cable             | Triceps                 |                           |

|                               |                    |        |
|-------------------------------|--------------------|--------|
| Dual pulley pulldown seated   | Lats               |        |
|                               | Biceps             |        |
| Pulley: biceps curl cable     | Biceps             |        |
| Pulley: upright row 2 pulleys | Shoulder anterior  | Biceps |
|                               | Shoulder posterior |        |
