# Supplementary material for: A Muscle Load Feedback Application for Strength Training: A Proof-of-Concept Study
Source: MDPI journal article supplement (doi:10.3390/sports11090170), 2023-09-05
Supplement: s1 [file s1]

## Supplementary file S3: Muscle soreness questionnaire in Dutch (filled in as example)

Heeft u op dit moment spierpijn? \*

☒ Ja

☐ Nee

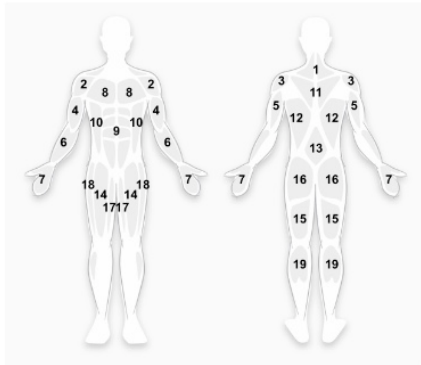

Geef aan waar u de afgelopen 7 dagen spierpijn heeft gehad. (Meerdere antwoorden mogelijk)

- ☐ 1. Nek
- ☐ 2. Schouders voorkant
- ☐ 3. Schouders achterkant
- ☐ 4. Biceps
- ☒ 5. Triceps
- ☐ 6. Onderarmen
- ☐ 7. Handen
- ☐ 8. Borst
- ☐ 9. Rechte buikspieren
- ☐ 10. Schuine buikspieren
- ☒ 11. Bovenrug
- ☐ 12. Zijkanten rug (lats)
- ☐ 13. Onderrug
- ☐ 14. Bovenbeen voorkant (quadriceps)
- ☐ 15. Bovenbeen achterkant (hamstrings)
- ☐ 16. Bilspieren
- ☐ 17. Bovenbeen binnenkant (lies)
- ☐ 18. Bovenbeen buitenkant
- ☐ 19. Onderbeen achterkant (kuit)

Wat was de intensiteit van de spierpijn in de achterkant van de bovenarmen (triceps) (5)?

Hele lichte spierpijn

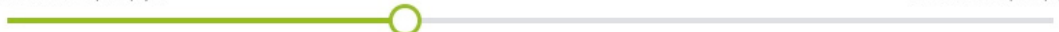

Maximale spierpijn

Wat was de intensiteit van de spierpijn in de bovenrug (11)?

Hele lichte spierpijn

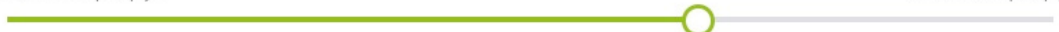

Maximale spierpijn
